# Supplementary material for: The Slowdown of Growth Rate Controls the Single-Cell Distribution of Biofilm Matrix Production via an SinI-SinR-SlrR Network
Source: PubMed Central journal article supplement (PMC10134886; doi:10.1128/msystems.00622-22), 2023-02-14
Supplement: msystems.00622-22-s0005.pdf [file msystems.00622-22-s0005.pdf]

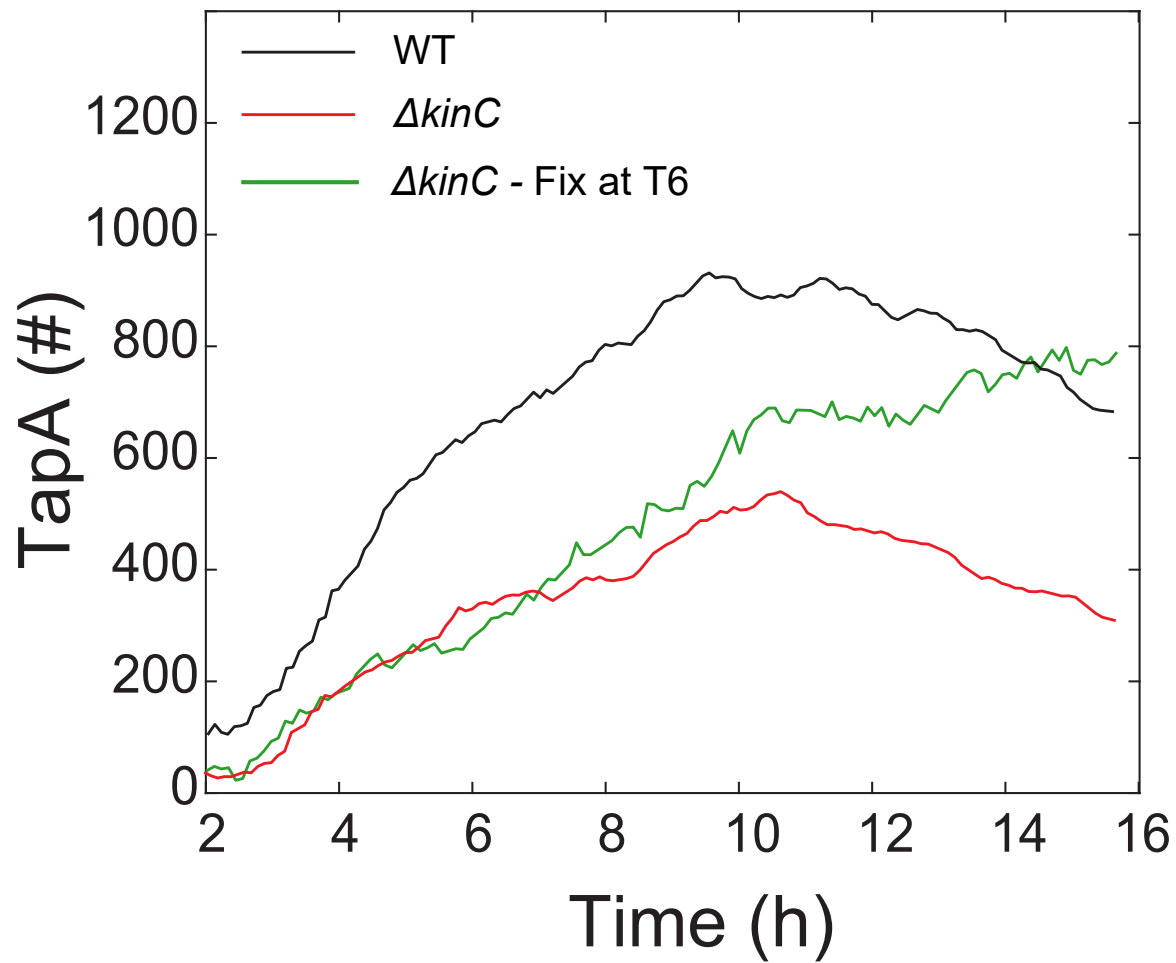

**Figure S5: *tapA* expression is not in a steady-state during simulation.** The red and black line shows the dynamics of mean TapA levels of WT and  $\Delta kinC$  strains, which are same as Fig. 4B. The green line shows the mean TapA levels of  $\Delta kinC$  strain supposing the growth rate stops to decrease and fixed at T6.
