# Supplementary material for: The Slowdown of Growth Rate Controls the Single-Cell Distribution of Biofilm Matrix Production via an SinI-SinR-SlrR Network
Source: PubMed Central journal article supplement (PMC10134886; doi:10.1128/msystems.00622-22), 2023-02-14
Supplement: msystems.00622-22-s0007.pdf [file msystems.00622-22-s0007.pdf]

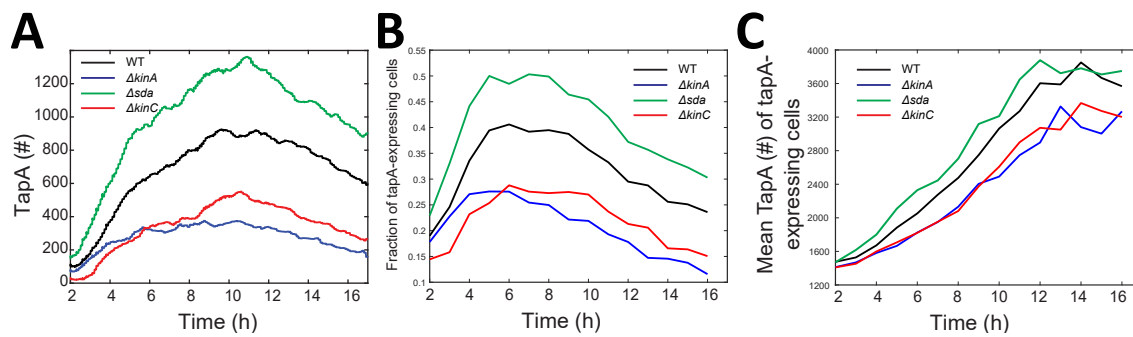

**Figure S7: Effects of tapA-expressing cell fraction and tapA-expressing levels.**

(A) Simulated *tapA* expression dynamics in different strains (Copied from Fig. 4B).

(B) Simulated dynamics of the fraction of *tapA*-expressing cells.

(C) Simulated dynamics of mean TapA level of all *tapA*-expressing cells.
